# Supplementary material for: Catalytic activity of bimetallic catalysts highly sensitive to the atomic composition and phase structure at the nanoscale
Source: Royal Society of Chemistry journal article supplement (doi:10.1039/c5nr04535e), 2015-01-01
Supplement: c5nr04535e1.pdf [file c5nr04535e1.pdf]

## Supporting information

### Catalytic Activity of Bimetallic Catalysts Highly Sensitive to Atomic Composition and Phase Structure at the Nanoscale

Shiyao Shan,<sup>a</sup> Valeri Petkov,<sup>b,\*</sup> Binay Prasai,<sup>b</sup> Jinfang Wu,<sup>a</sup> Pharrah Joseph,<sup>a</sup> Zakiya Skeete<sup>a</sup>, Eunjoo Kim,<sup>a</sup> Derrick Mott,<sup>c</sup> Oana Malis,<sup>d</sup> Jin Luo,<sup>a</sup> and Chuan-Jian Zhong,<sup>a,\*</sup>

<sup>a</sup>) Department of Chemistry, State University of New York at Binghamton, Binghamton, NY 13902, USA

<sup>b</sup>) Department of Physics, Central Michigan University, Mt. Pleasant, Michigan 48859, USA

<sup>c</sup>) School of Materials Science, Japan Advanced Institute of Science and Technology, 1-1 Asahidai, Nomi, 923-1292 Ishikawa, Japan.

<sup>d</sup>) Department of Physics, Purdue University, West Lafayette, IN, USA

(\* To whom correspondence should be addressed. Emails: cjzhong@binghamton.edu, and petko1vg@cmich.edu))

#### Additional Experimental Data:

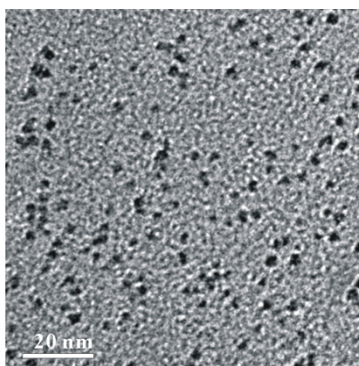

**Figure S1.** A representative TEM image for a sample of as-synthesized (E-) Pd<sub>58</sub>Cu<sub>42</sub> nanoparticles.

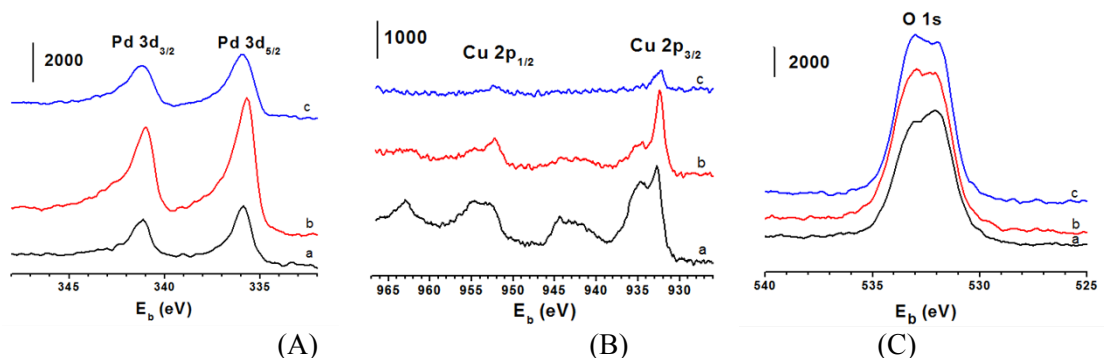

**Figure S2.** XPS spectra of carbon-supported (B-) Pd<sub>21</sub>Cu<sub>79</sub>/C (black, a), Pd<sub>48</sub>Cu<sub>52</sub>/C (red, b) and Pd<sub>75</sub>Cu<sub>25</sub>/C (blue, c) in regions of Pd 3d(A), Cu 2p(B) and O 1s (D)

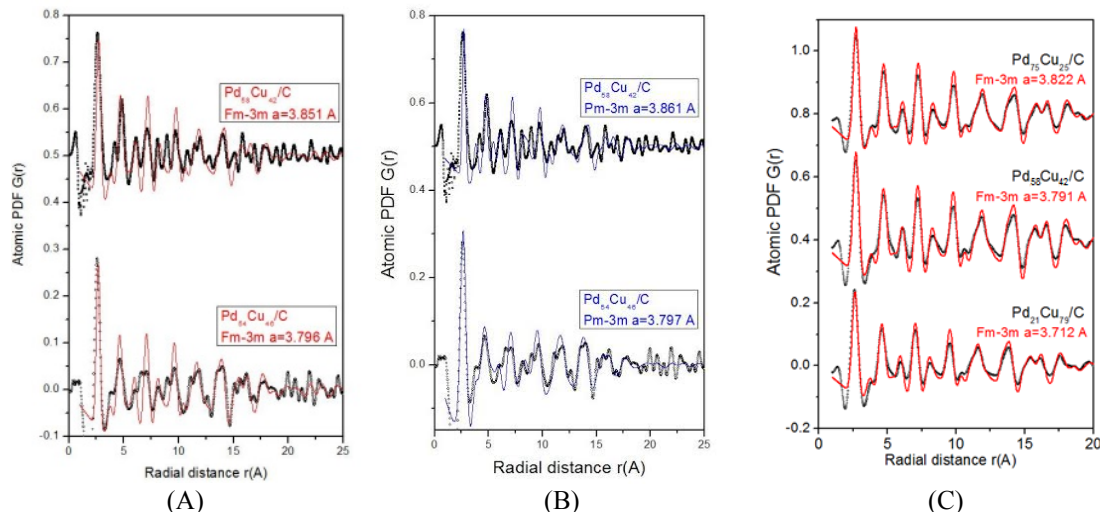

**Figure S3.** Experimental (black symbols) and fcc model (A, line in red) and bcc model (B, line in blue) atomic PDFs for both (E-) Pd<sub>58</sub>Cu<sub>42</sub>/C (top) and (B-) Pd<sub>54</sub>Cu<sub>46</sub>/C (bottom) under H<sub>2</sub> at 200 °C. Model PDFs were fitted with both a chemically disordered alloy with a fcc-type (Fm-3m) structure and a chemically ordered alloy with a bcc-type (Pm-3m) structure. Refined fcc lattice parameters and bcc lattice parameters are shown by each data set. (C) Experimental (symbols) and model (line in red) atomic PDFs for fresh Pd<sub>25</sub>Cu<sub>75</sub>/C, Pd<sub>58</sub>Cu<sub>42</sub>/C and Pd<sub>77</sub>Cu<sub>23</sub>/C alloy NPs which were treated under O<sub>2</sub> at 260 °C followed by H<sub>2</sub> at 400 °C. Model PDFs feature a chemically disordered alloy with a fcc-type (Fm-3m) structure. Refined fcc lattice parameters are shown by each data set.

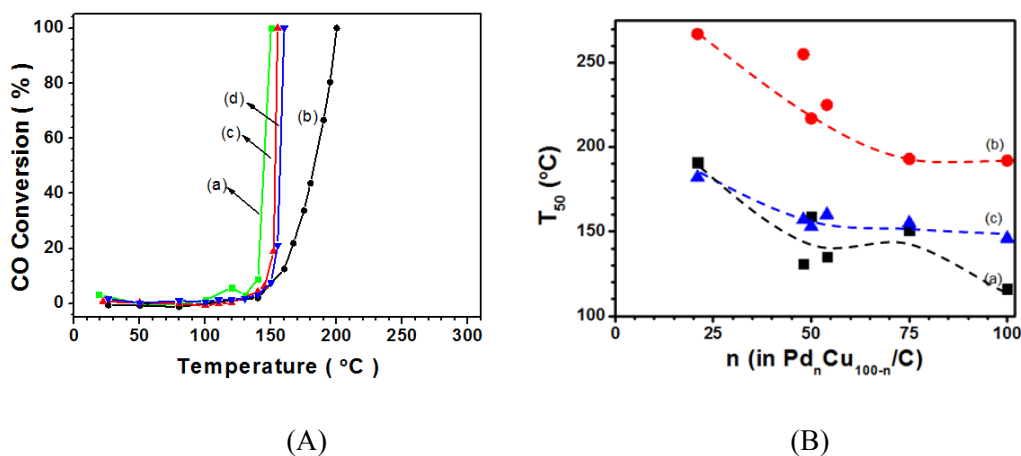

**Figure S4.** (A) CO oxidation activities for Pd (green, a), Pd<sub>21</sub>Cu<sub>79</sub> (black, b), Pd<sub>48</sub>Cu<sub>52</sub> (red, c), and Pd<sub>75</sub>Cu<sub>25</sub> (blue, d) catalysts in reduced (treated under H<sub>2</sub>) state and (B) T<sub>50</sub> values as a function of the bimetallic composition comparing (1) fresh catalysts (a, black); (2) catalysts oxidized under O<sub>2</sub> at 450 °C for 30min (b, red); and (3) catalysts reduced under H<sub>2</sub> at 300 °C for 30 min (c, blue).

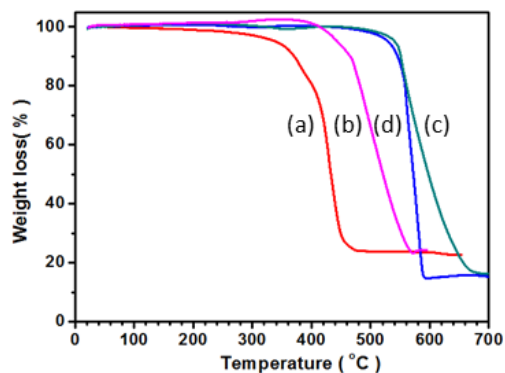

**Figure S5.** TGA curves for Cu/C (a, red) , Pd<sub>21</sub>Cu<sub>79</sub>/C (b, purple), Pd<sub>54</sub>Cu<sub>46</sub>/C (c, dark green), and Pd<sub>75</sub>Cu<sub>25</sub>/C (d, blue) catalysts under 30% O<sub>2</sub> at the flow rate of 130 ml/min.

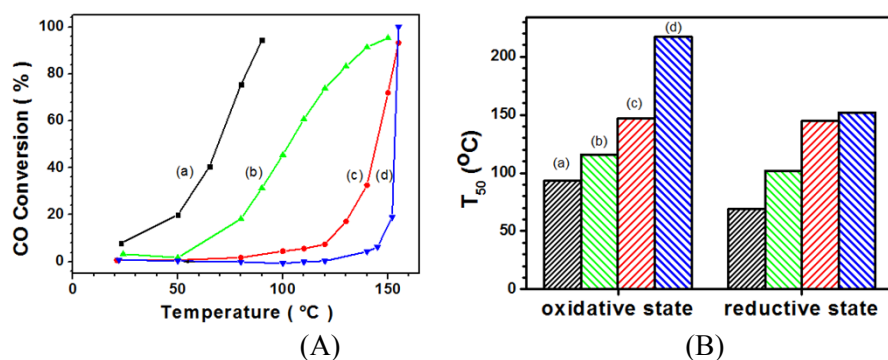

**Figure S6.** (A) CO oxidation activities for reduced Pd<sub>48</sub>Cu<sub>52</sub> alloy NPs on different support: TiO<sub>2</sub> (a, black); CeO<sub>2</sub> (b, green), SiO<sub>2</sub> (c, red), and carbon (d, blue) and (B) T<sub>50</sub> values for Pd<sub>48</sub>Cu<sub>52</sub> catalysts over different supports (i.e. TiO<sub>2</sub> (a, black), CeO<sub>2</sub> (b, green), SiO<sub>2</sub> (c, red), and Carbon (d, blue)) initially treated at 260 °C under N<sub>2</sub> and then under reductive under 15 vol. % H<sub>2</sub> at 400 °C followed by further treatment either under O<sub>2</sub> at 450 °C for 30 min, denoted on the plot as oxidative state, or under H<sub>2</sub> at 300 °C for 30 min, denoted on the plot as reductive state.

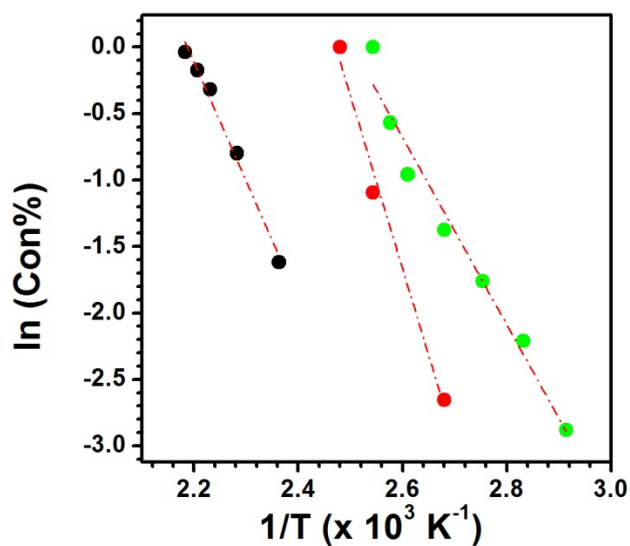

**Figure S7.** Arrhenius plots for CO oxidation over (E-) Pd<sub>25</sub>Cu<sub>75</sub>/C (a, black), Pd<sub>58</sub>Cu<sub>42</sub>/C (b, green), and Pd<sub>77</sub>Cu<sub>23</sub>/C (d, red) catalysts treated under O<sub>2</sub> at 260 °C for 30 min followed by under H<sub>2</sub> at 200 °C for 30 min.

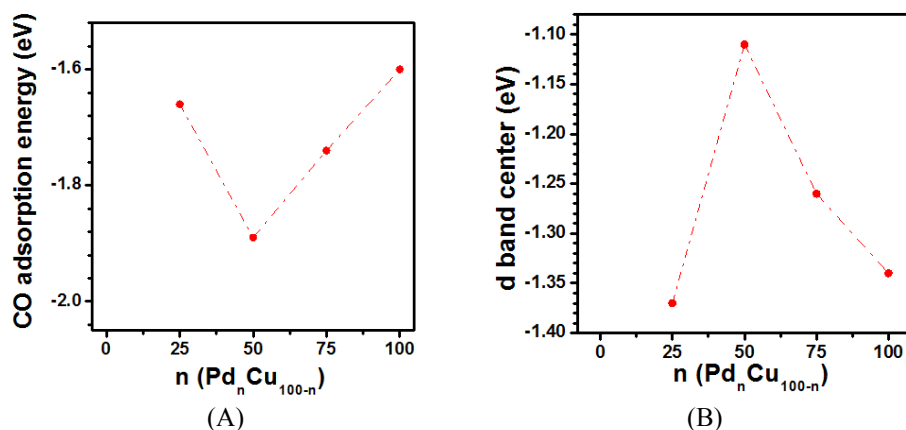

**Figure S8.** Plot of calculated adsorption energies (red) (A) and d-band center (B) as a function of binary composition for CO adsorption on models of 4-atom PdCu clusters.

**Table S1.** XPS peak binding energies (in eV) and relative elemental ratios for PdCu NPs of different compositions (Data pertain to (B-) PdCu NPs).

| Catalyst                          | Condition                               | Pd 3d        | Cu 2p          | C 1s                        | O 1s   | Elemental ratio |
|-----------------------------------|-----------------------------------------|--------------|----------------|-----------------------------|--------|-----------------|
| Pd <sub>21</sub> Cu <sub>79</sub> | O <sub>2</sub> -H <sub>2</sub> (400 °C) | 341.1, 335.9 | 932.71, 943.0, | 284.76 (2p <sub>3/2</sub> ) | 533.1, | 21:79           |
|                                   |                                         |              | 953.9, 962.9   |                             | 532.1  |                 |
| Pd <sub>48</sub> Cu <sub>52</sub> | O <sub>2</sub> -H <sub>2</sub> (400 °C) | 341.0, 335.7 | 932.44, 952.3  | 284.8 (2p <sub>3/2</sub> )  | 532.9, | 60:40           |
|                                   |                                         |              |                |                             | 532.2  |                 |
| Pd <sub>75</sub> Cu <sub>25</sub> | O <sub>2</sub> -H <sub>2</sub> (400 °C) | 341.2, 335.9 | 932.2, 952.5   | 284.76 (2p <sub>3/2</sub> ) | 533.0, | 81:19           |
|                                   |                                         |              |                |                             | 531.9  |                 |

Note: The C 1s peak (284.75 eV) was used as an internal standard for the peak calibration.

**Table S2** Fcc type lattice parameter a data and first neighbor distance data for (B-) Pd<sub>21</sub>Cu<sub>79</sub>/C

| Temperature  | Fcc type, a (Å) | First PDF peak (Å) |
|--------------|-----------------|--------------------|
| Room         | 3.675           | 2.58               |
| 200C         | 3.698           | 2.57               |
| 400C-1min    | 3.698           | 2.57               |
| 400C-10min   | 3.698           | 2.57               |
| 400C-20min   | 3.697           | 2.57               |
| 400C-30min   | 3.697           | 2.60               |
| Back to room | N/A             | 2.87               |

**Table S3.** Comparison of kinetic data of the different PdCu nanoalloy catalysts

| Catalysts   | d <sub>NPs</sub> (nm) | ECA (m <sup>2</sup> /mg <sub>Pt</sub> ) <sup>a</sup> | Thermal treatment              | Reaction rate(×10 <sup>-6</sup> mol/(g <sub>Pd</sub> .s) <sup>b</sup> (T <sub>-100%</sub> ) | Ave. D (Dispersion, %) <sup>c</sup> | TOF (×10 <sup>-2</sup> s <sup>-1</sup> ) <sup>d</sup> | E <sub>a</sub> (kJ mol <sup>-1</sup> ) <sup>f</sup> |
|-------------|-----------------------|------------------------------------------------------|--------------------------------|---------------------------------------------------------------------------------------------|-------------------------------------|-------------------------------------------------------|-----------------------------------------------------|
| Pd          | ~7.0                  | 25                                                   | H <sub>2</sub>                 | 2.27*10-5(150)                                                                              | 15                                  | 1.52                                                  | 41.4                                                |
| B-Pd21Cu79D | 7.4±1.2               | -                                                    | N <sub>2</sub> -H <sub>2</sub> | 6.37*10-5(200)                                                                              | 11                                  | 5.90                                                  | -                                                   |
| B-Pd48Cu52D | 6.0±0.8               | -                                                    | N <sub>2</sub> -H <sub>2</sub> | 4.85*10-5(155)                                                                              | 18                                  | 2.78                                                  | -                                                   |
| B-Pd75Cu25D | 4.9±0.5               | -                                                    | N <sub>2</sub> -H <sub>2</sub> | 3.63*10-5(160)                                                                              | 14                                  | 2.66                                                  | -                                                   |
| B-Pd21Cu79M | 7.4±1.2               | 8.3                                                  | N <sub>2</sub> -H <sub>2</sub> | 7.10*10-6(140)                                                                              | 11                                  | 0.66                                                  | 112.6                                               |

|             |         |     |                                |                             |    |       |      |
|-------------|---------|-----|--------------------------------|-----------------------------|----|-------|------|
| B-Pd54Cu46M | 6.0±0.8 | 37  | N <sub>2</sub> -H <sub>2</sub> | 1.41*10 <sup>-5</sup> (100) | 18 | 0.81  | 46.2 |
| B-Pd75Cu25M | 4.9±0.5 | 21  | N <sub>2</sub> -H <sub>2</sub> | 8.08*10 <sup>-6</sup> (120) | 14 | 0.59  | 58.5 |
| E-Pd25Cu75M | 2.7±0.5 | 23  | N <sub>2</sub> -H <sub>2</sub> | 8.63*10 <sup>-6</sup> (140) | 21 | 0.44  | 53.2 |
| E-Pd58Cu42M | 2.6±0.6 | 81  | N <sub>2</sub> -H <sub>2</sub> | 1.12*10 <sup>-5</sup> (100) | 43 | 0.28  | 39.6 |
| E-Pd77Cu23M | 3.5±0.7 | 100 | N <sub>2</sub> -H <sub>2</sub> | 3.30*10 <sup>-7</sup> (120) | 32 | 0.011 | 89.7 |

Note: D is shortened for deep oxidation, where data collected at 300 °C H<sub>2</sub> reduction; while M is shortened for mild oxidation where data collected at 200 °C H<sub>2</sub> reduction. <sup>a</sup> Electricchemically active surface area (ECA) was determined by cycle votammtry. <sup>b</sup>Calculation of reaction rate was based on moles of CO reacted at the flow rate and was normalized against the total mass of Pd in the catalyst. <sup>c</sup>The dispersion of Pd on the surface of one NP was calculated using  $D = (6V_m / (a_m d)) \times 100\%$ , where  $V_m$  is the volume of atom Pd,  $a_m$  is Pd surface area, and  $d$  is the particle size. <sup>d</sup> Calculation of TOF was based on the surface Pd using  $TOF = \text{Reaction rate} / (\text{MW}(\text{Pd}) \times D)$ . Note that the metal loading (20%) is significantly higher than usual (0.1~8%), leading to a higher percentage of buried nanoparticle surface in this work. <sup>d</sup>Data derived from Arrhenius plots (See Figure S8).

**Table S4.** Calculated adsorption energy,  $E_{\text{ads}}$  (eV), and d-band center of molecularly adsorbed CO on Pd<sub>4</sub>, Pd<sub>3</sub>Cu<sub>1</sub>, Pd<sub>2</sub>Cu<sub>2</sub>, Pd<sub>1</sub>Cu<sub>3</sub> systems. (Pd: blue dots, Cu: orange dots, C: grey dots and O: red dots)

|                       | Pd4-CO                                                                            | Pd3Cu1-CO                                                                         | Pd2Cu2-CO                                                                          | Pd1Cu3-CO                                                                           |
|-----------------------|-----------------------------------------------------------------------------------|-----------------------------------------------------------------------------------|------------------------------------------------------------------------------------|-------------------------------------------------------------------------------------|
| Model                 | 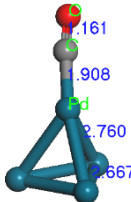 |  |  |  |
| $E_{\text{ads}}$ (eV) | -1.60                                                                             | -1.74                                                                             | -1.89                                                                              | -1.66                                                                               |
| O-C bond/ Å           | 1.161                                                                             | 1.162                                                                             | 1.164                                                                              | 1.162                                                                               |
| C-Pd bond/ Å          | 1.908                                                                             | 1.902                                                                             | 1.898                                                                              | 1.900                                                                               |
| d-band center /eV     | -1.34                                                                             | -1.26                                                                             | -1.11                                                                              | -1.37                                                                               |
